# Supplementary material for: DNA barcoding, ecology and geography of the cryptic species of Aneura pinguis and their relationships with Aneura maxima and Aneura mirabilis (Metzgeriales, Marchantiophyta)
Source: PubMed Central journal article supplement (PMC5716573; doi:10.1371/journal.pone.0188837), 2017-12-05

A

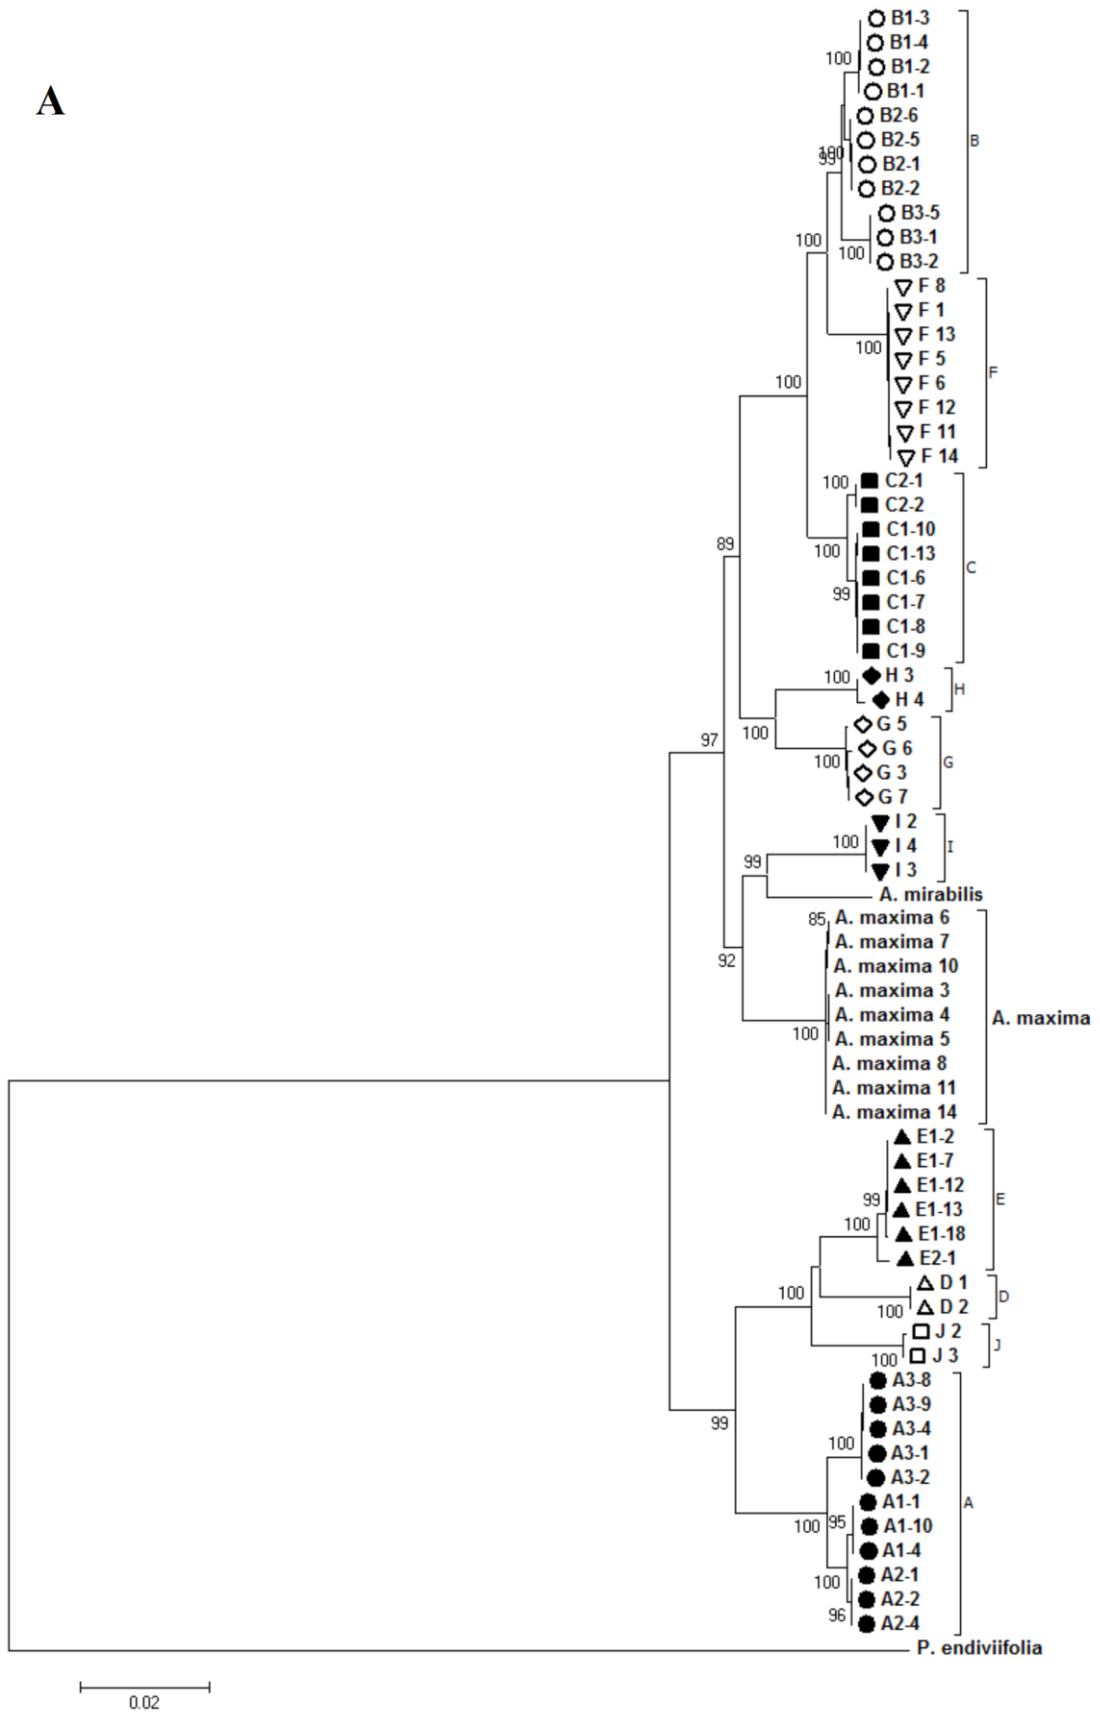

**B**

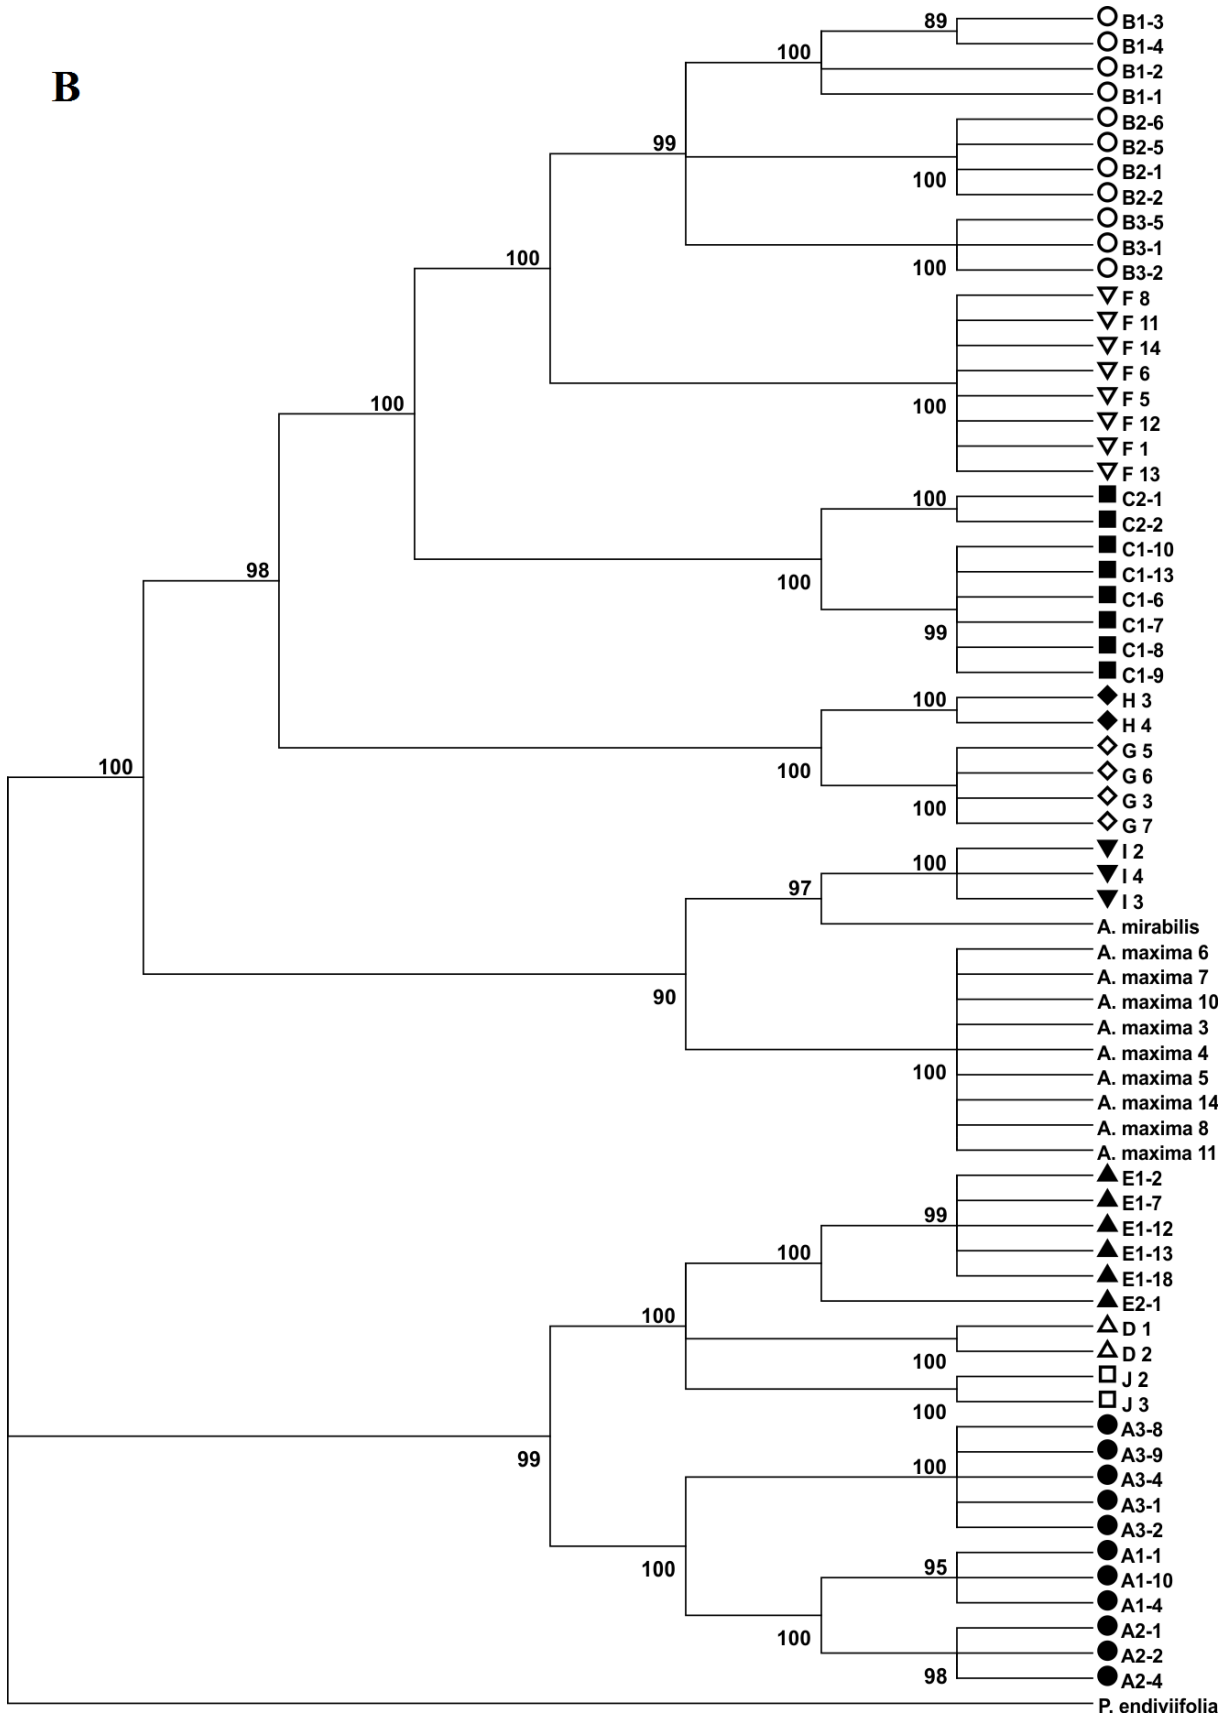

Supplement: pone.0188837.s005.pdf [file pone.0188837.s005.pdf]
