# Supplementary material for: DNA barcoding, ecology and geography of the cryptic species of Aneura pinguis and their relationships with Aneura maxima and Aneura mirabilis (Metzgeriales, Marchantiophyta)
Source: PubMed Central journal article supplement (PMC5716573; doi:10.1371/journal.pone.0188837), 2017-12-05

S2 Fig. Neighbor-joining 75% majority-rule bootstrap consensus trees for the studied species of *Aneura* genus.

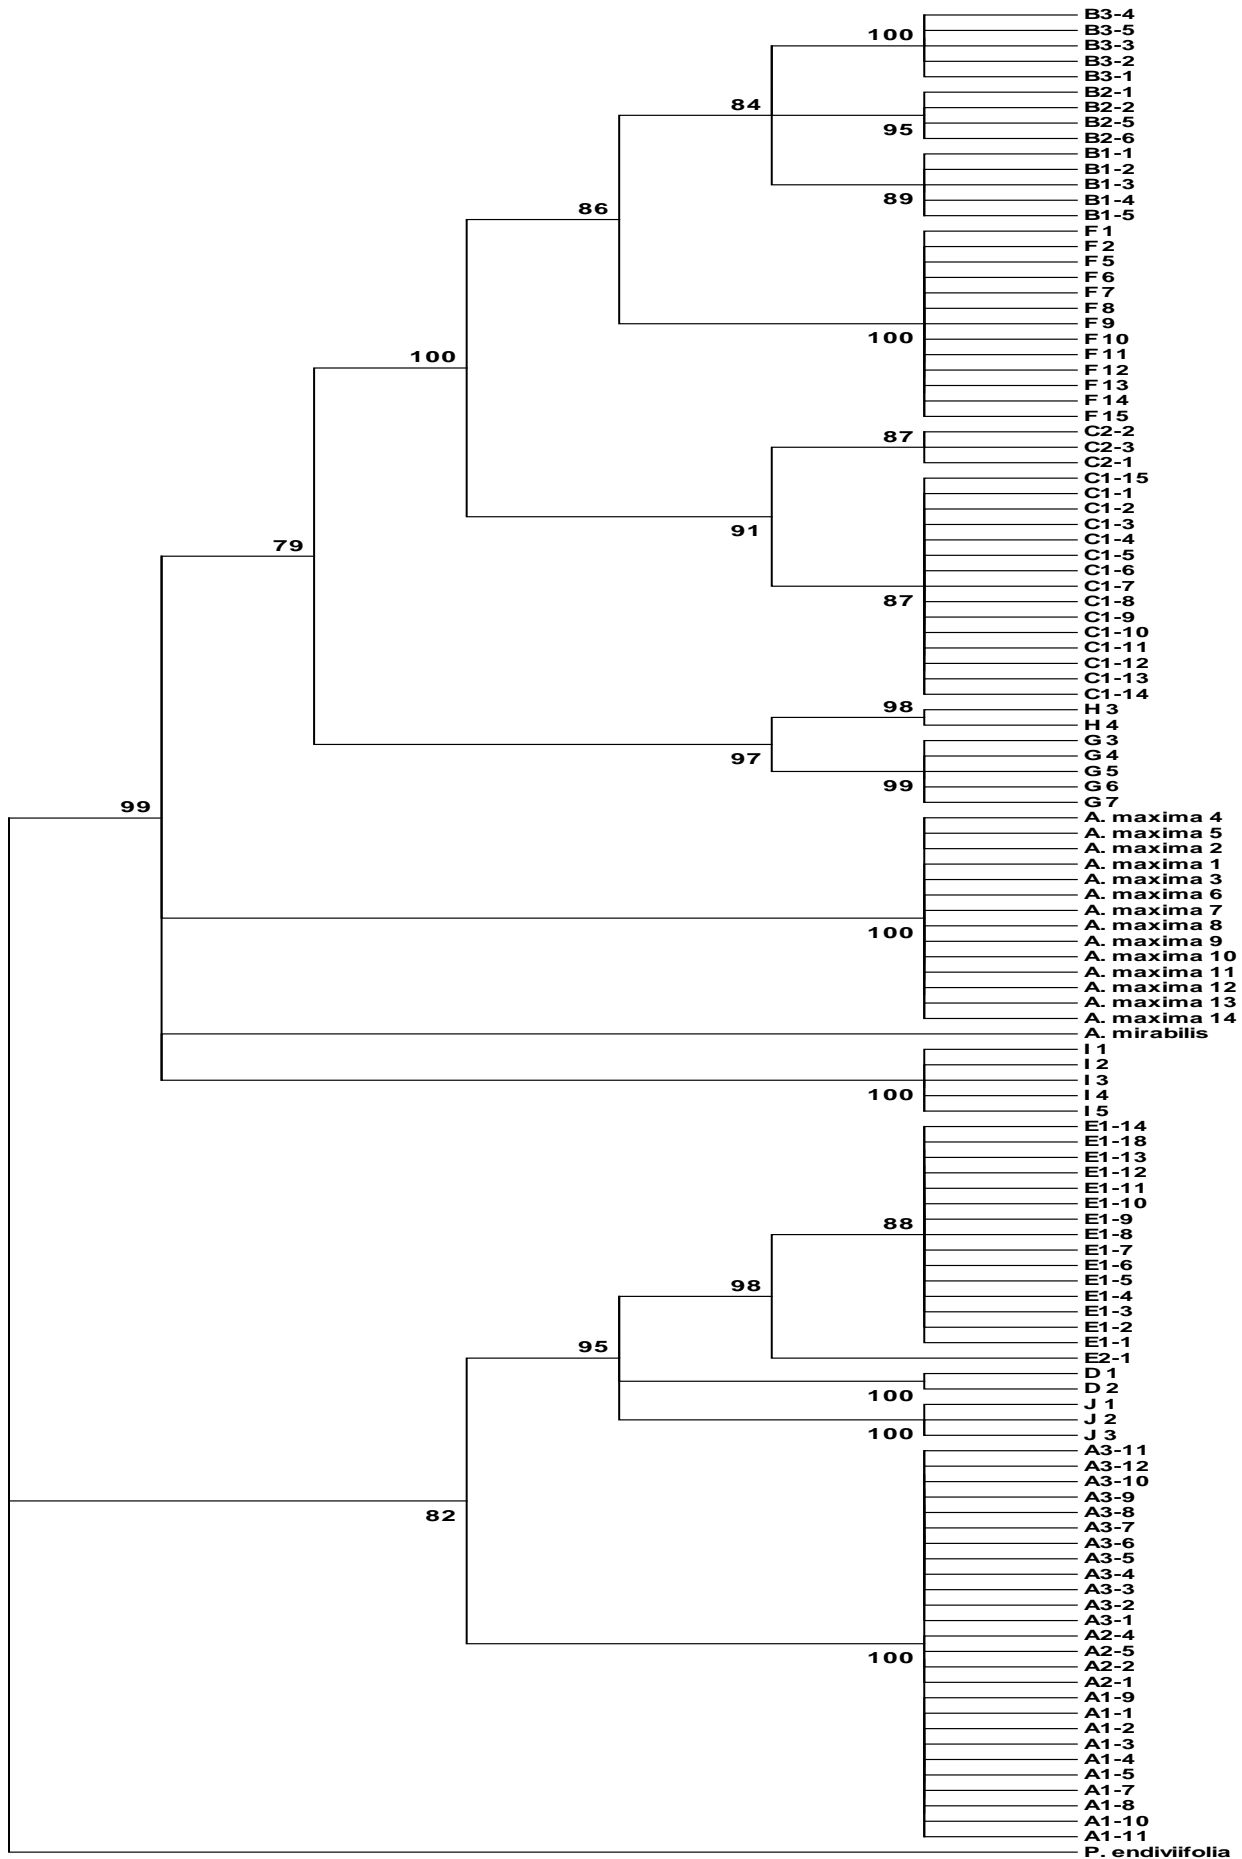

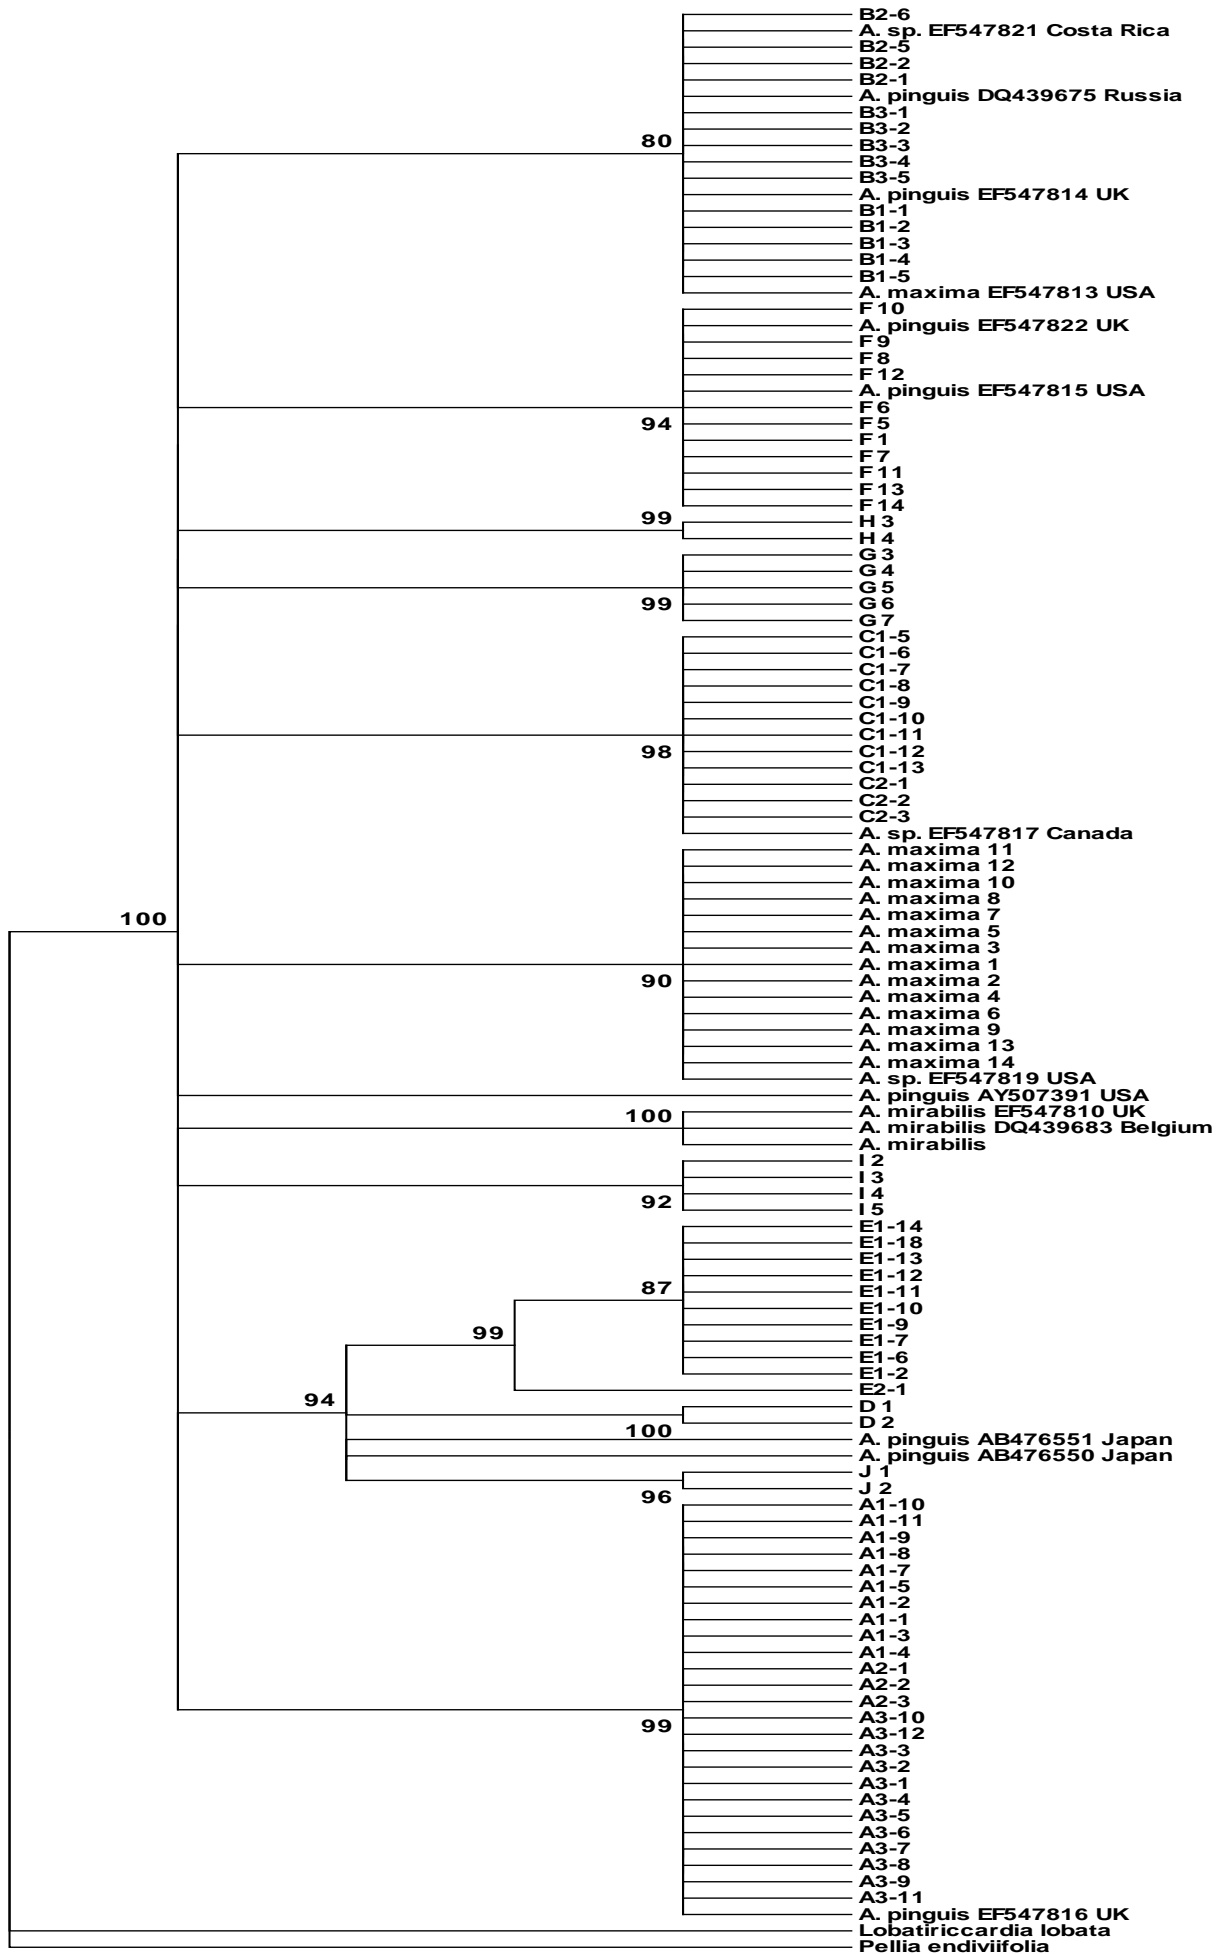



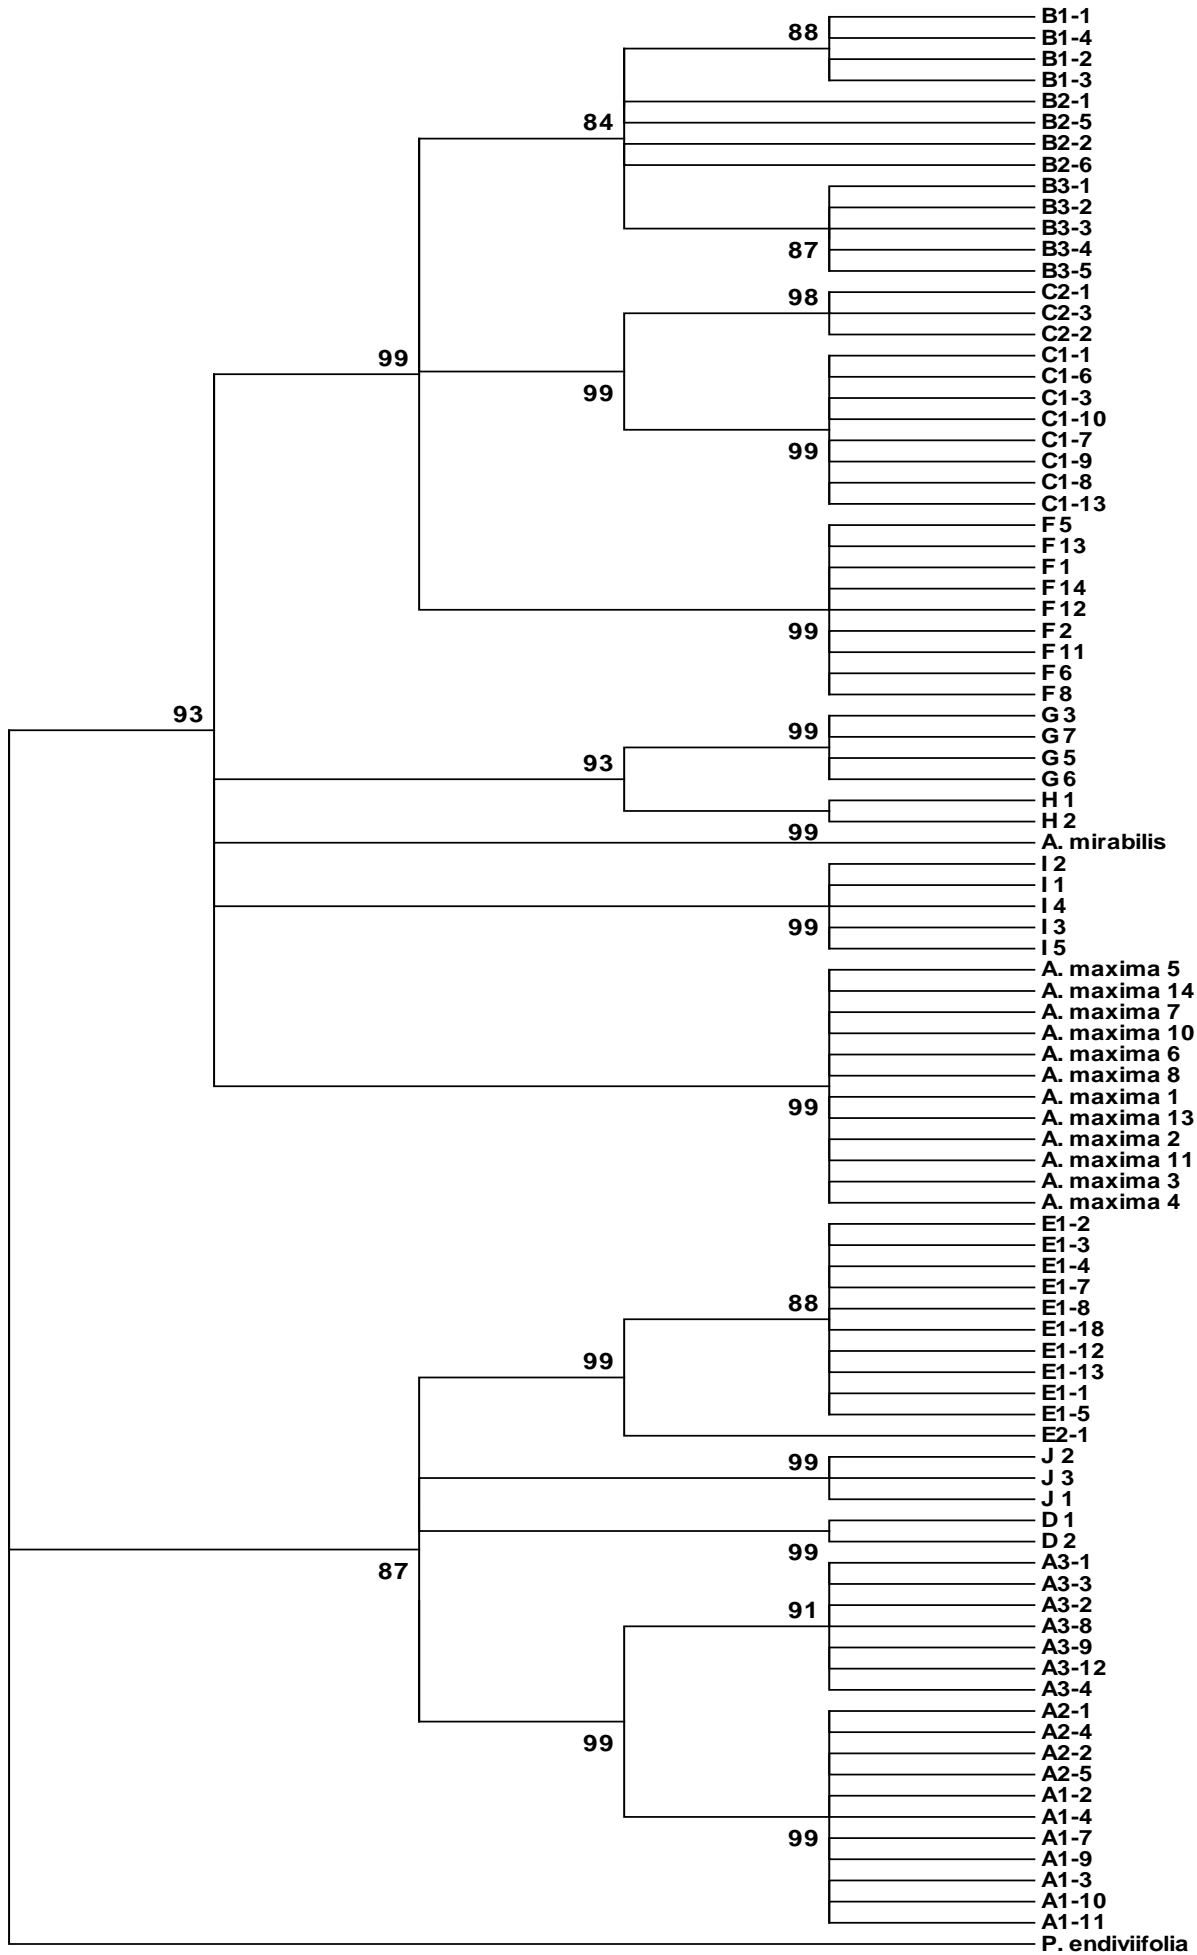

*trnH-psbA*



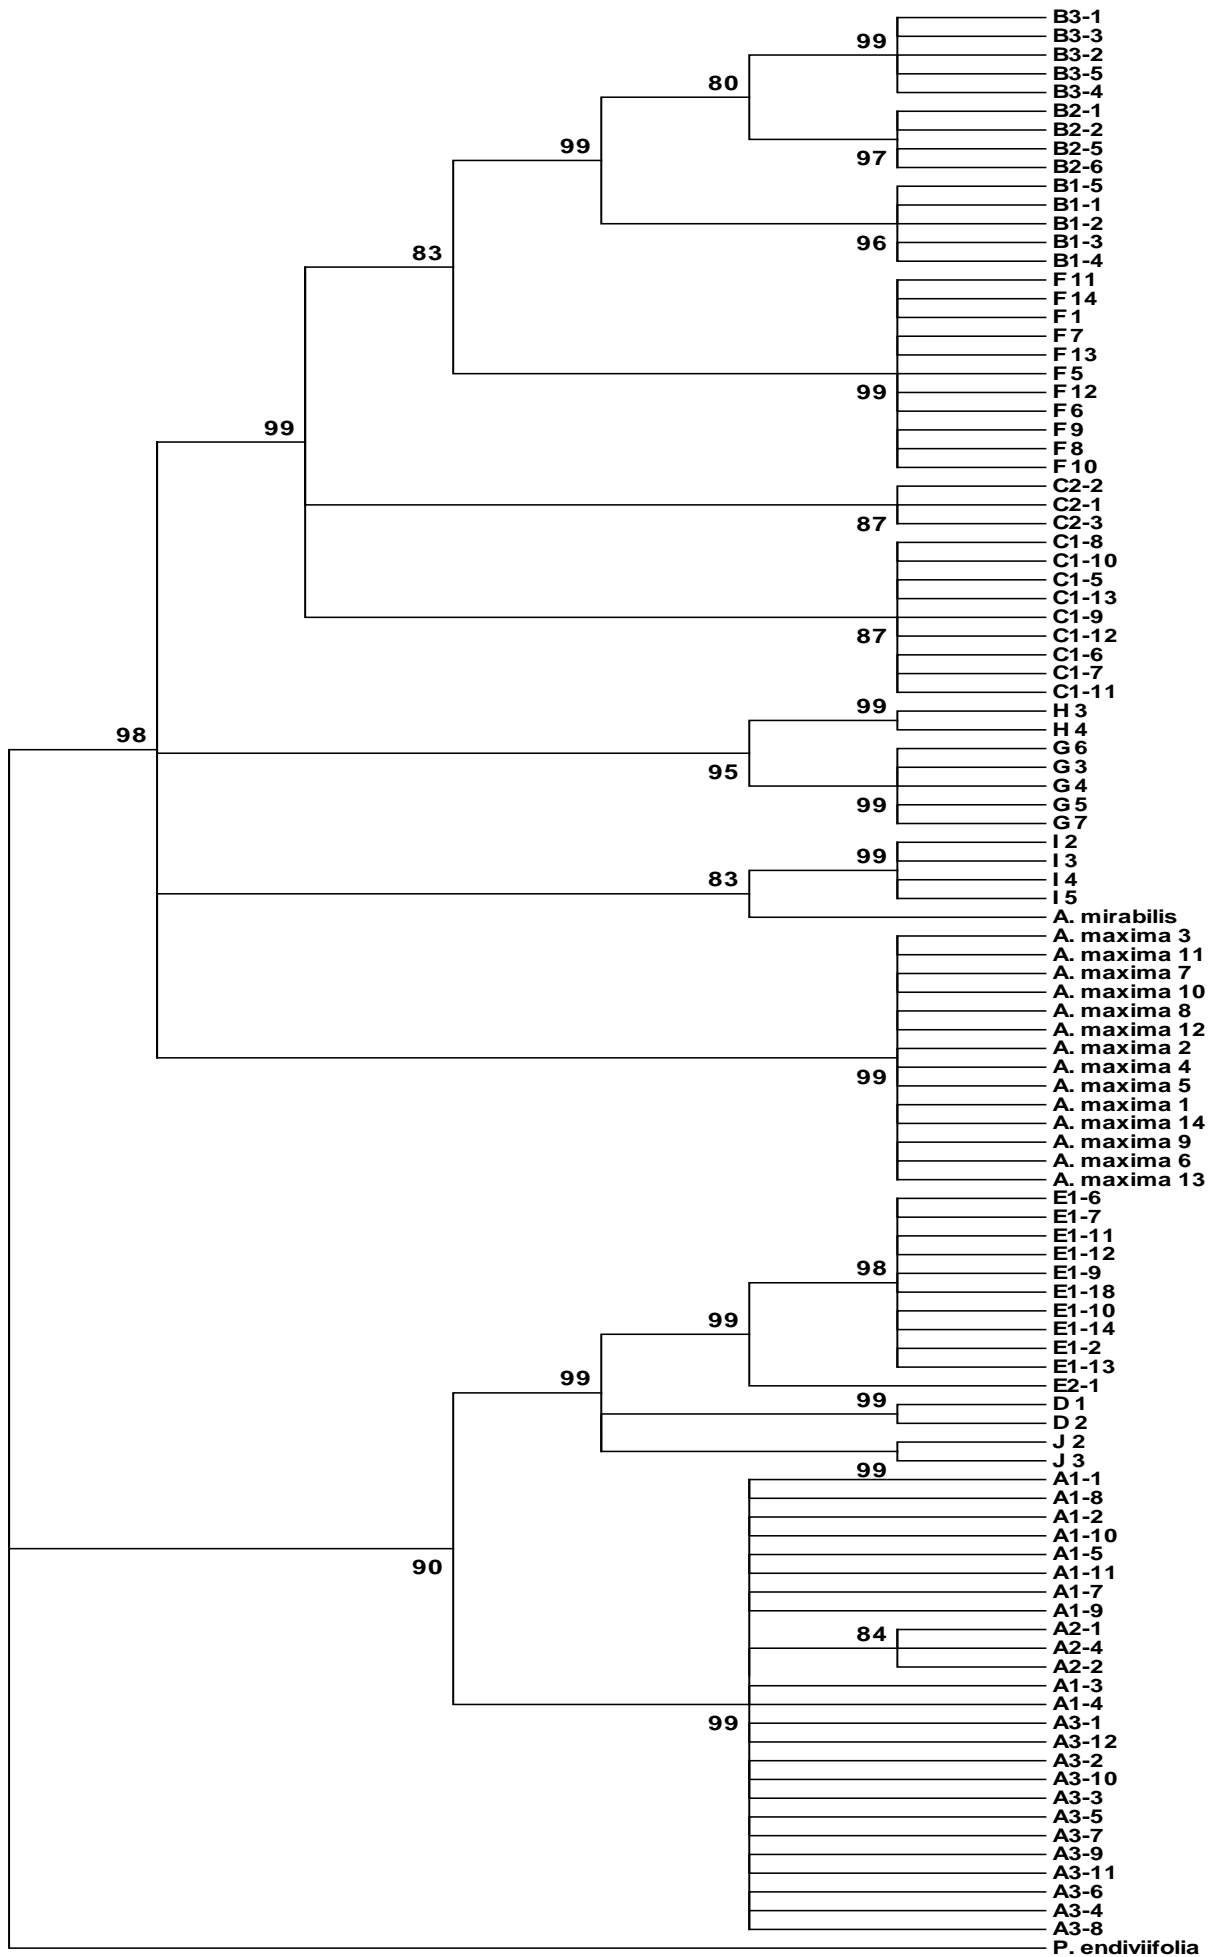

*matK+rbcl*

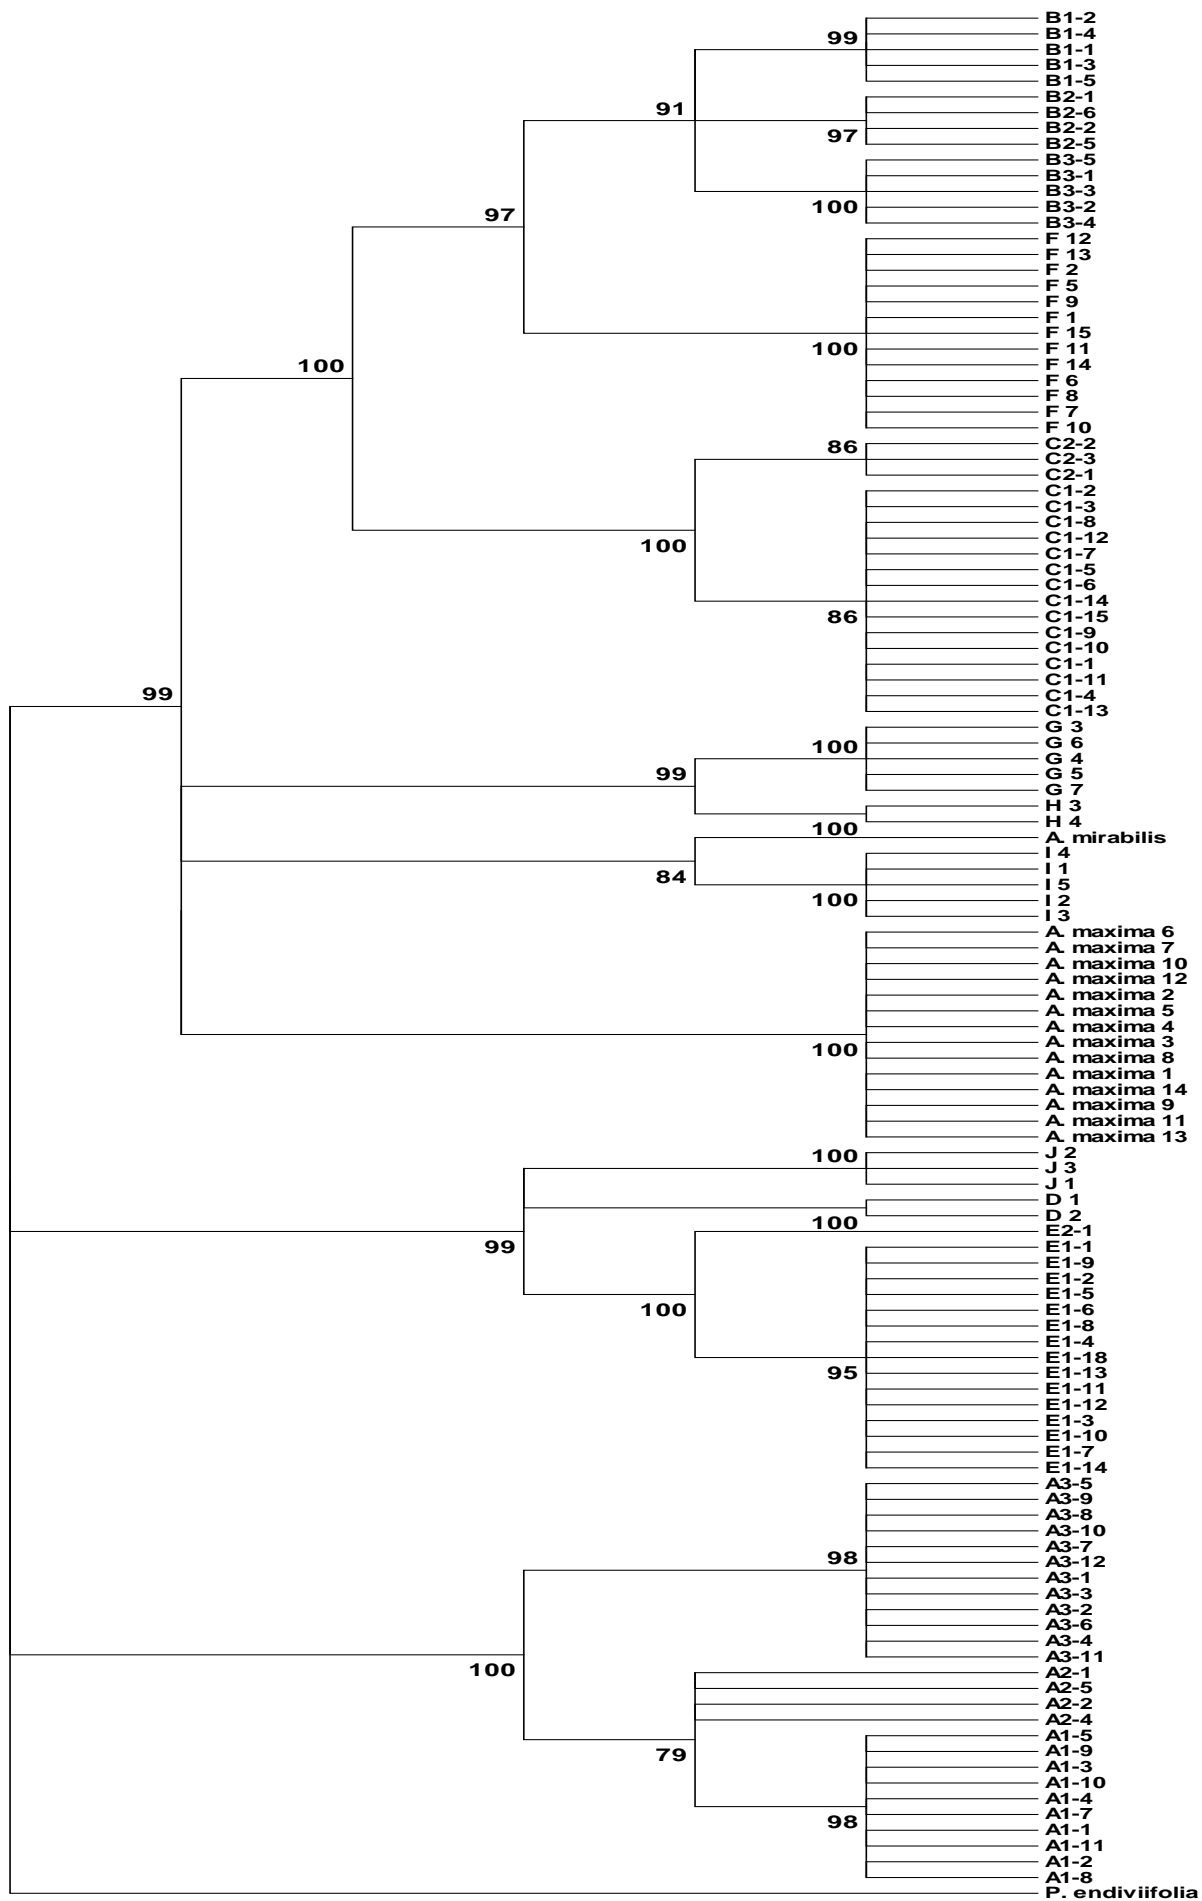

*matK+trnL-F*

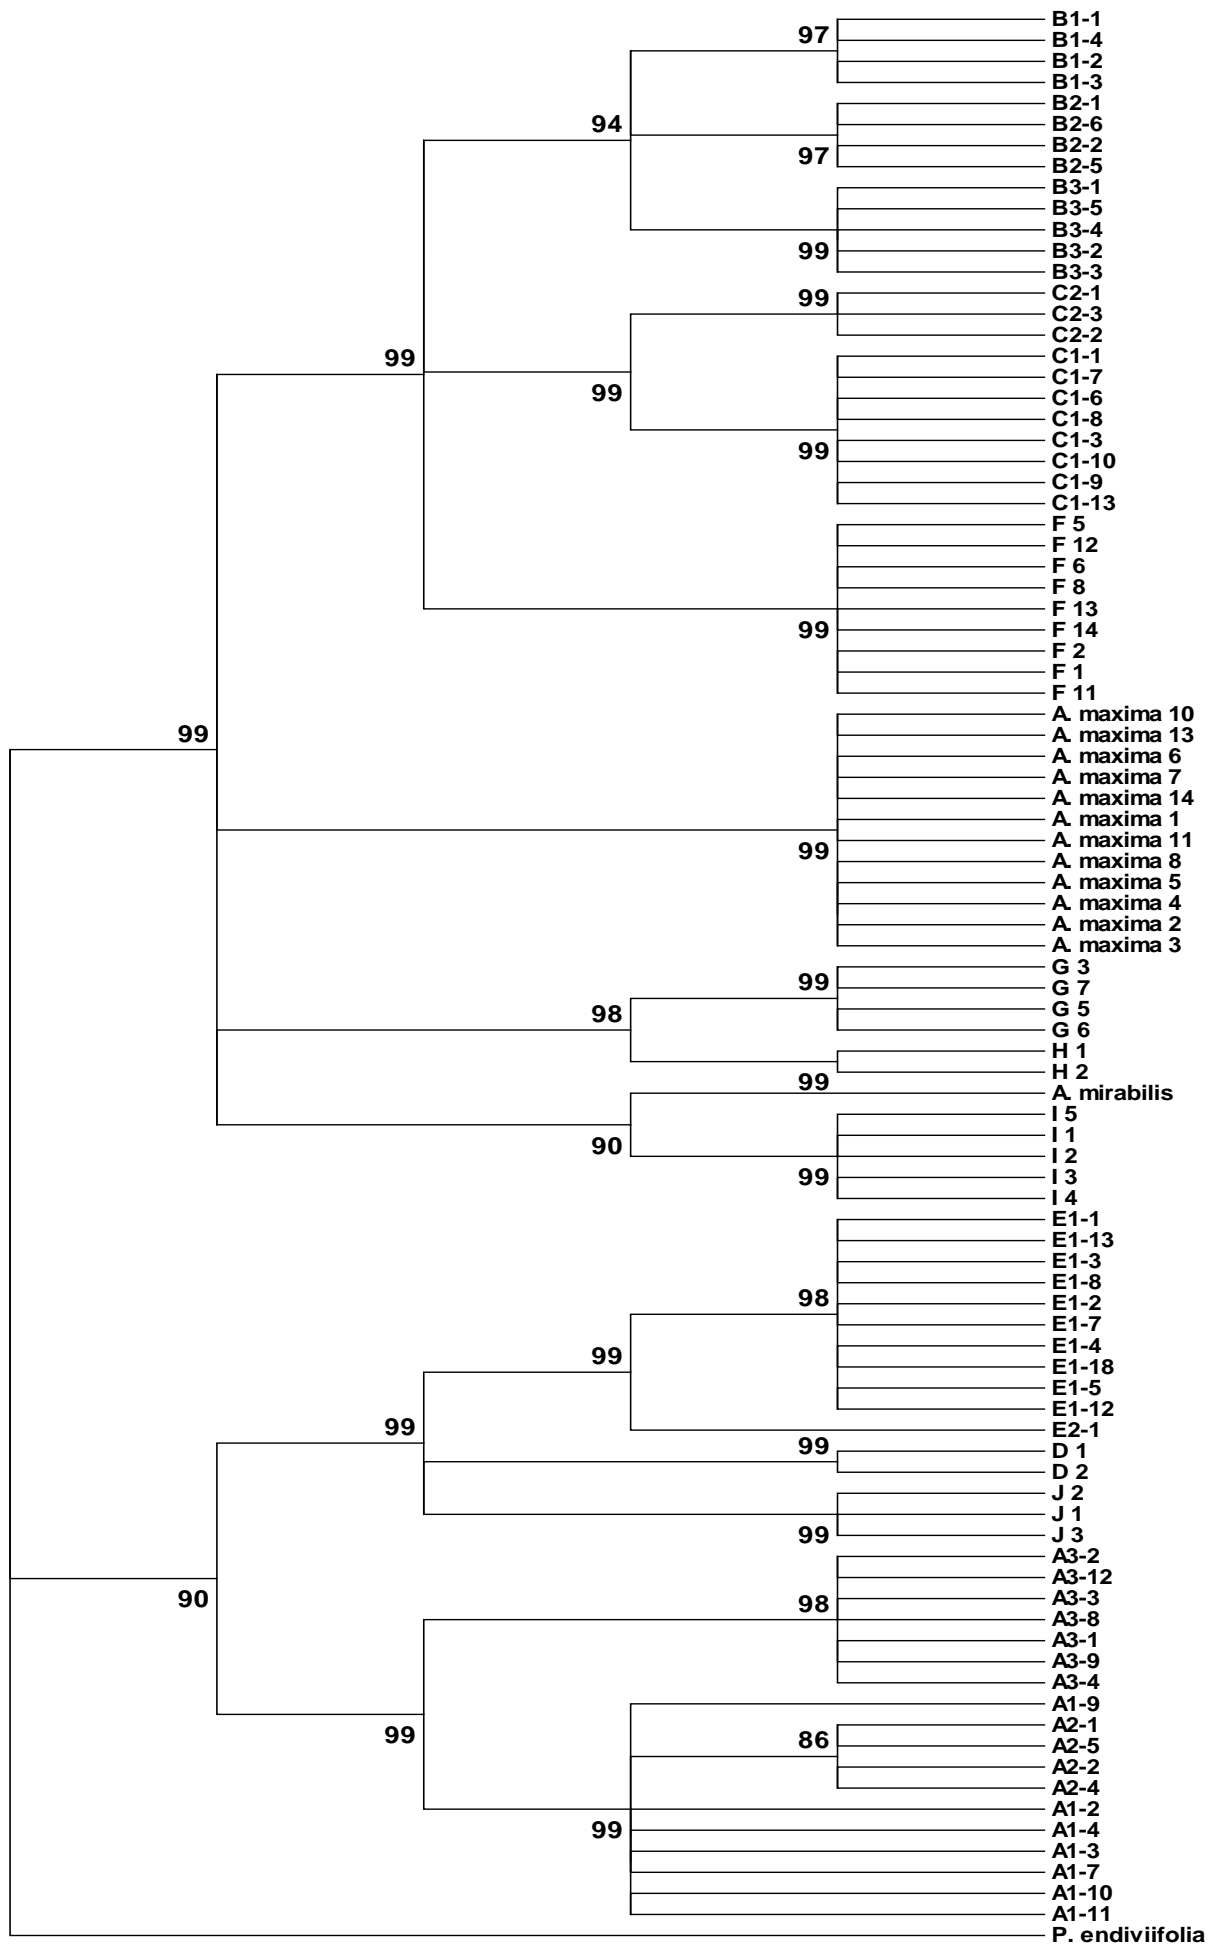

*matK+trnH-psbA*



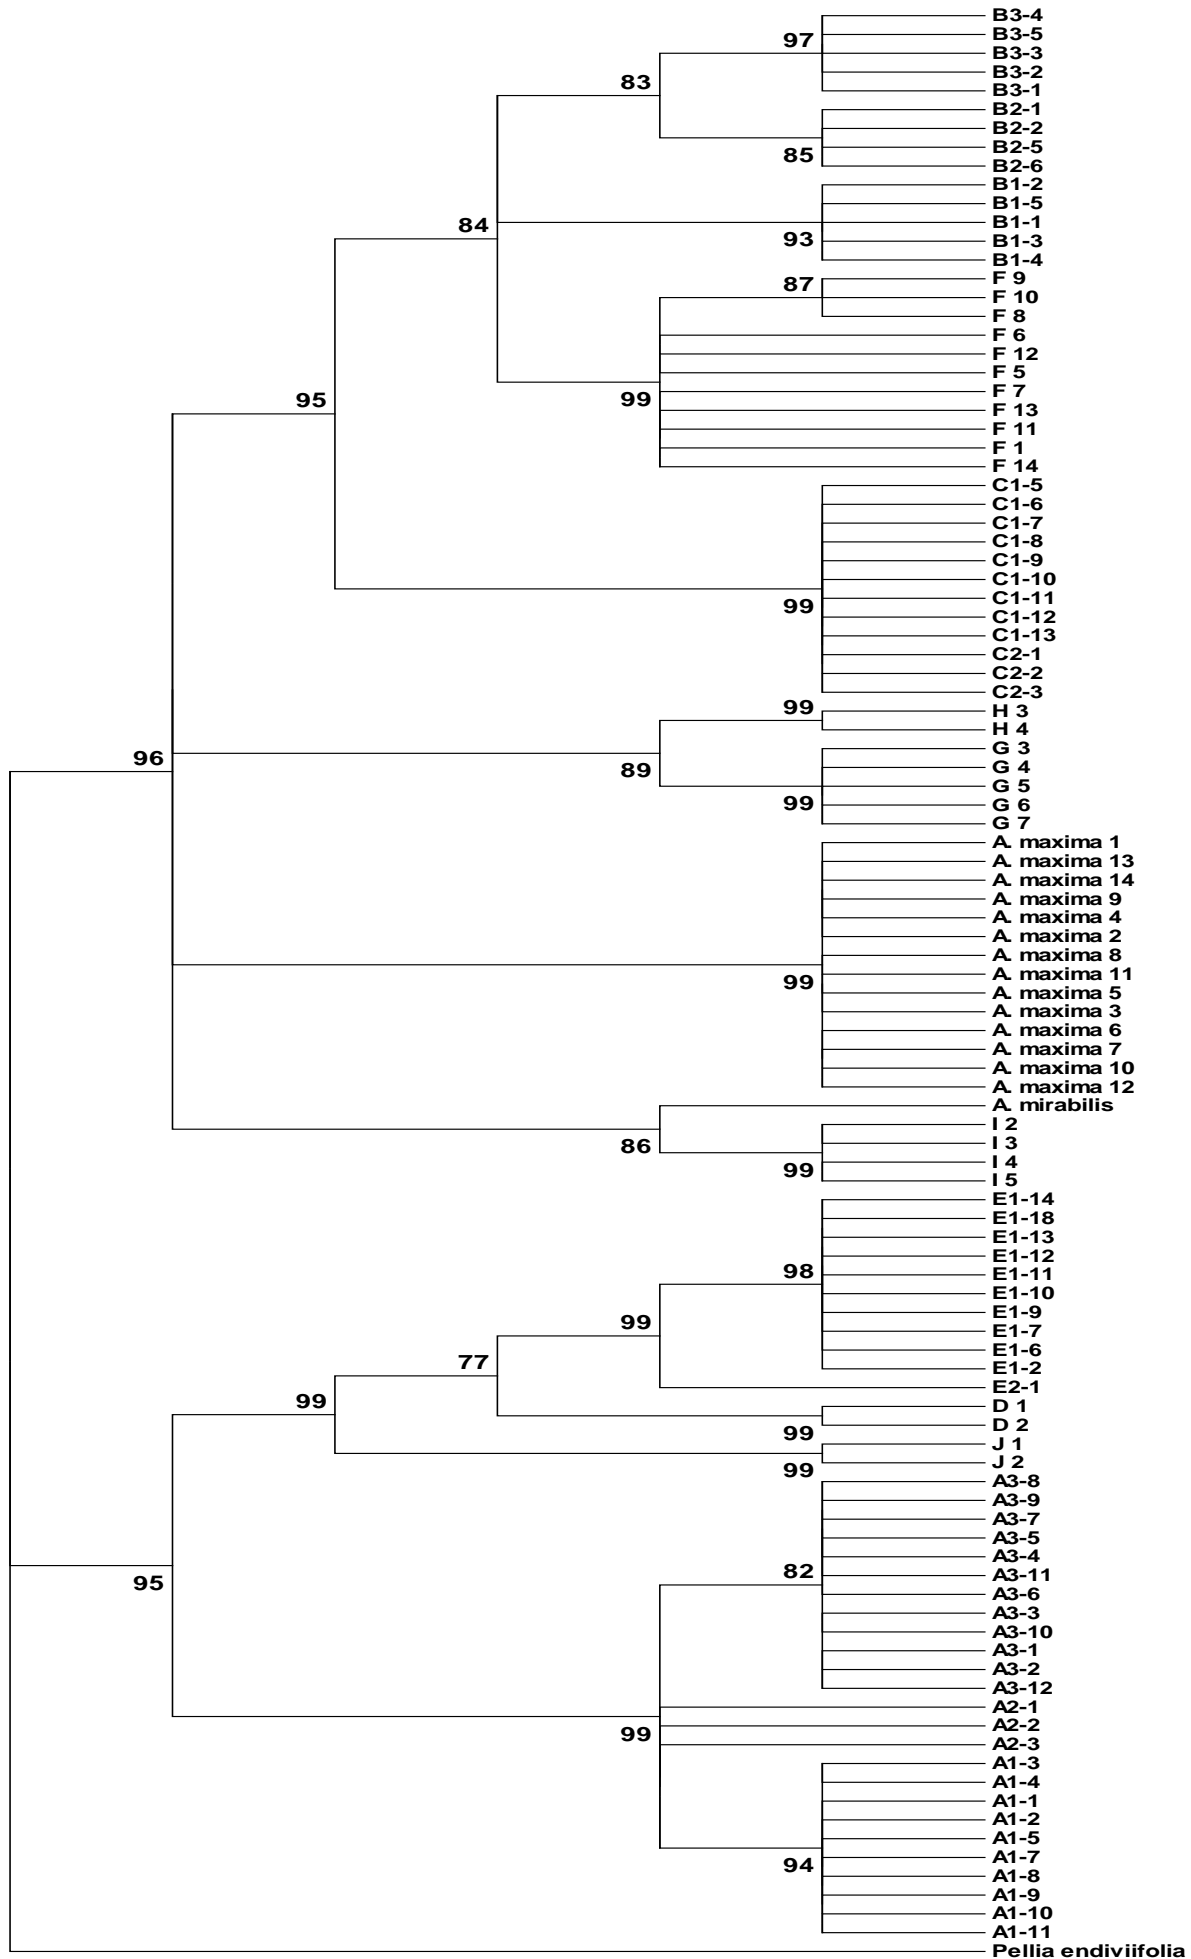

*rbcL+trnL-F*

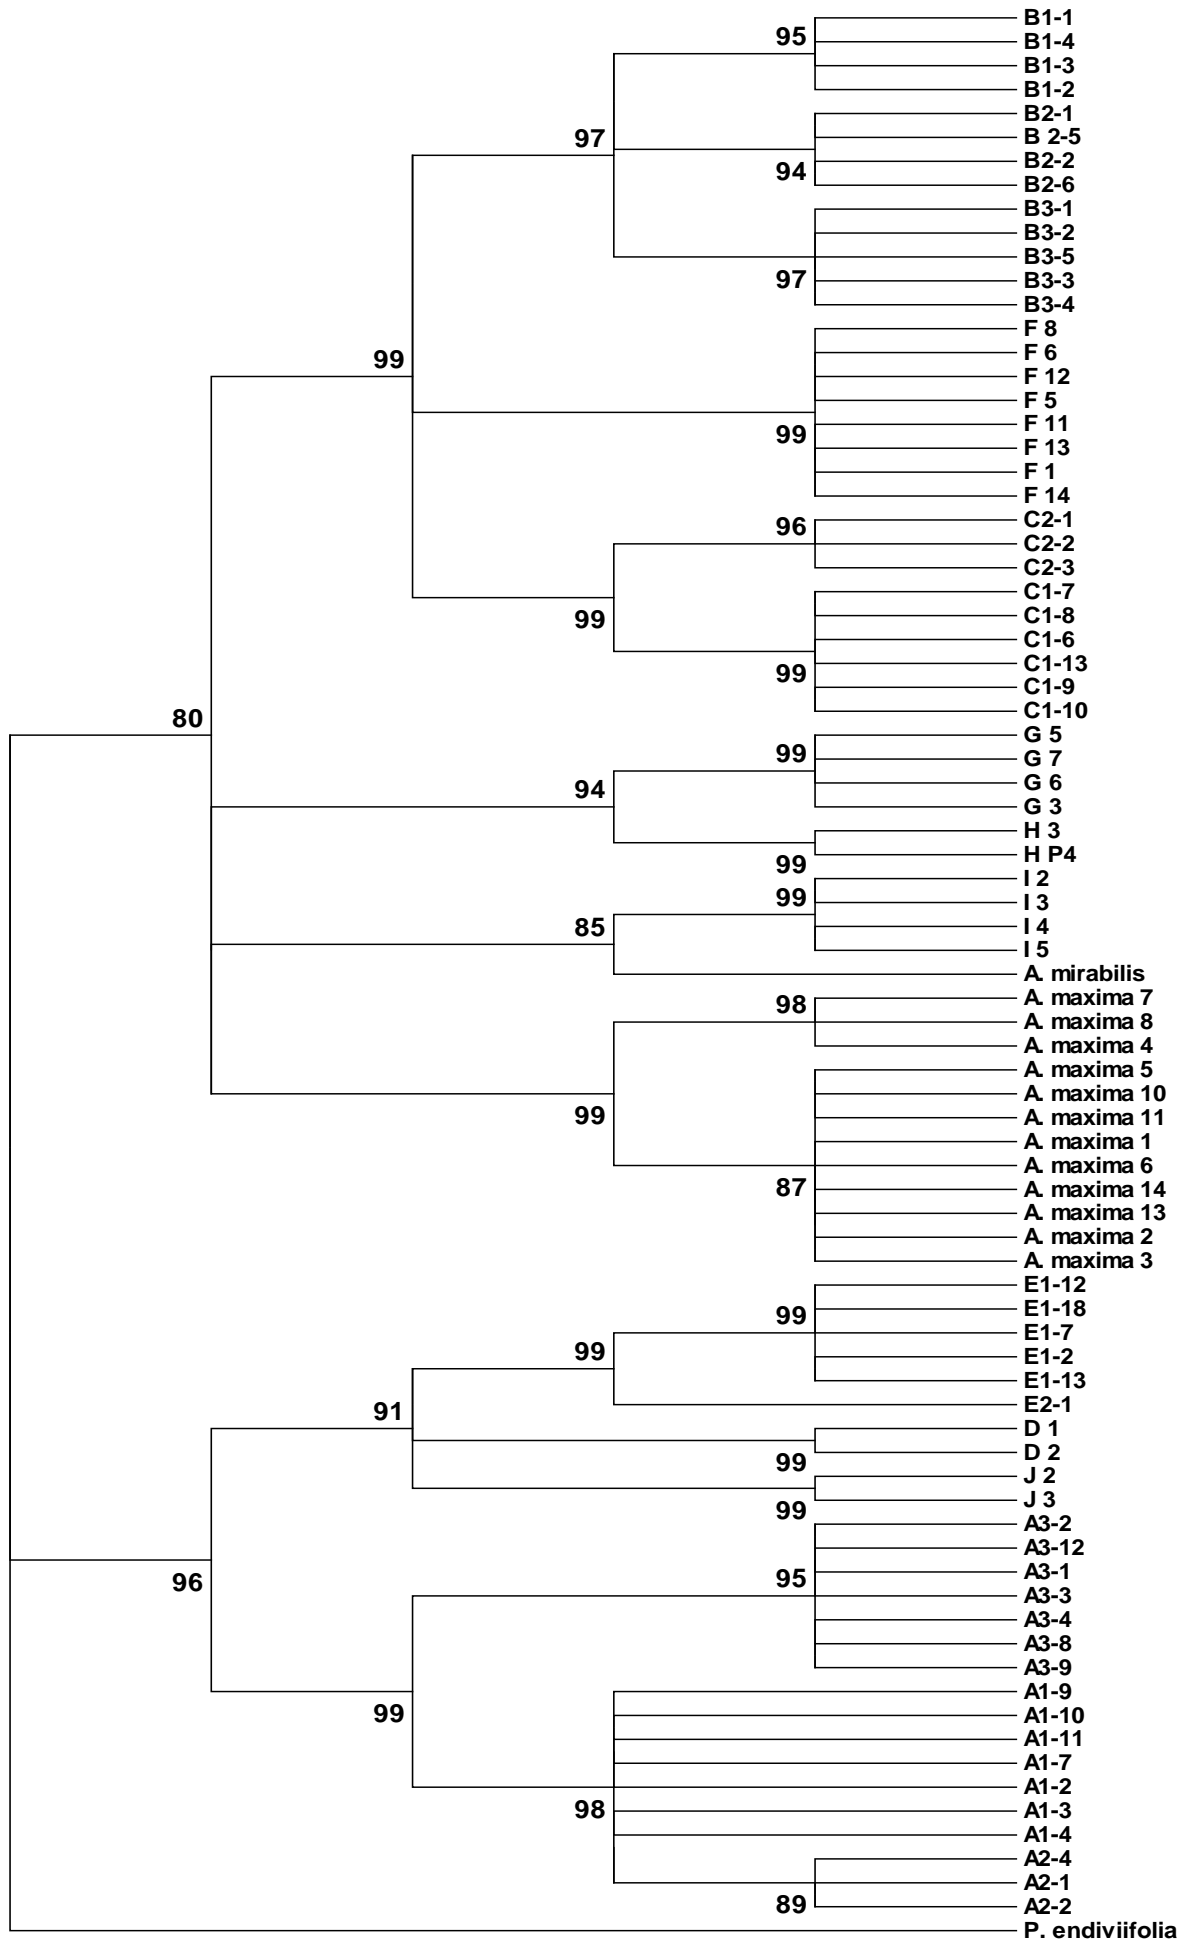

*rbcL+trnH-psbA*

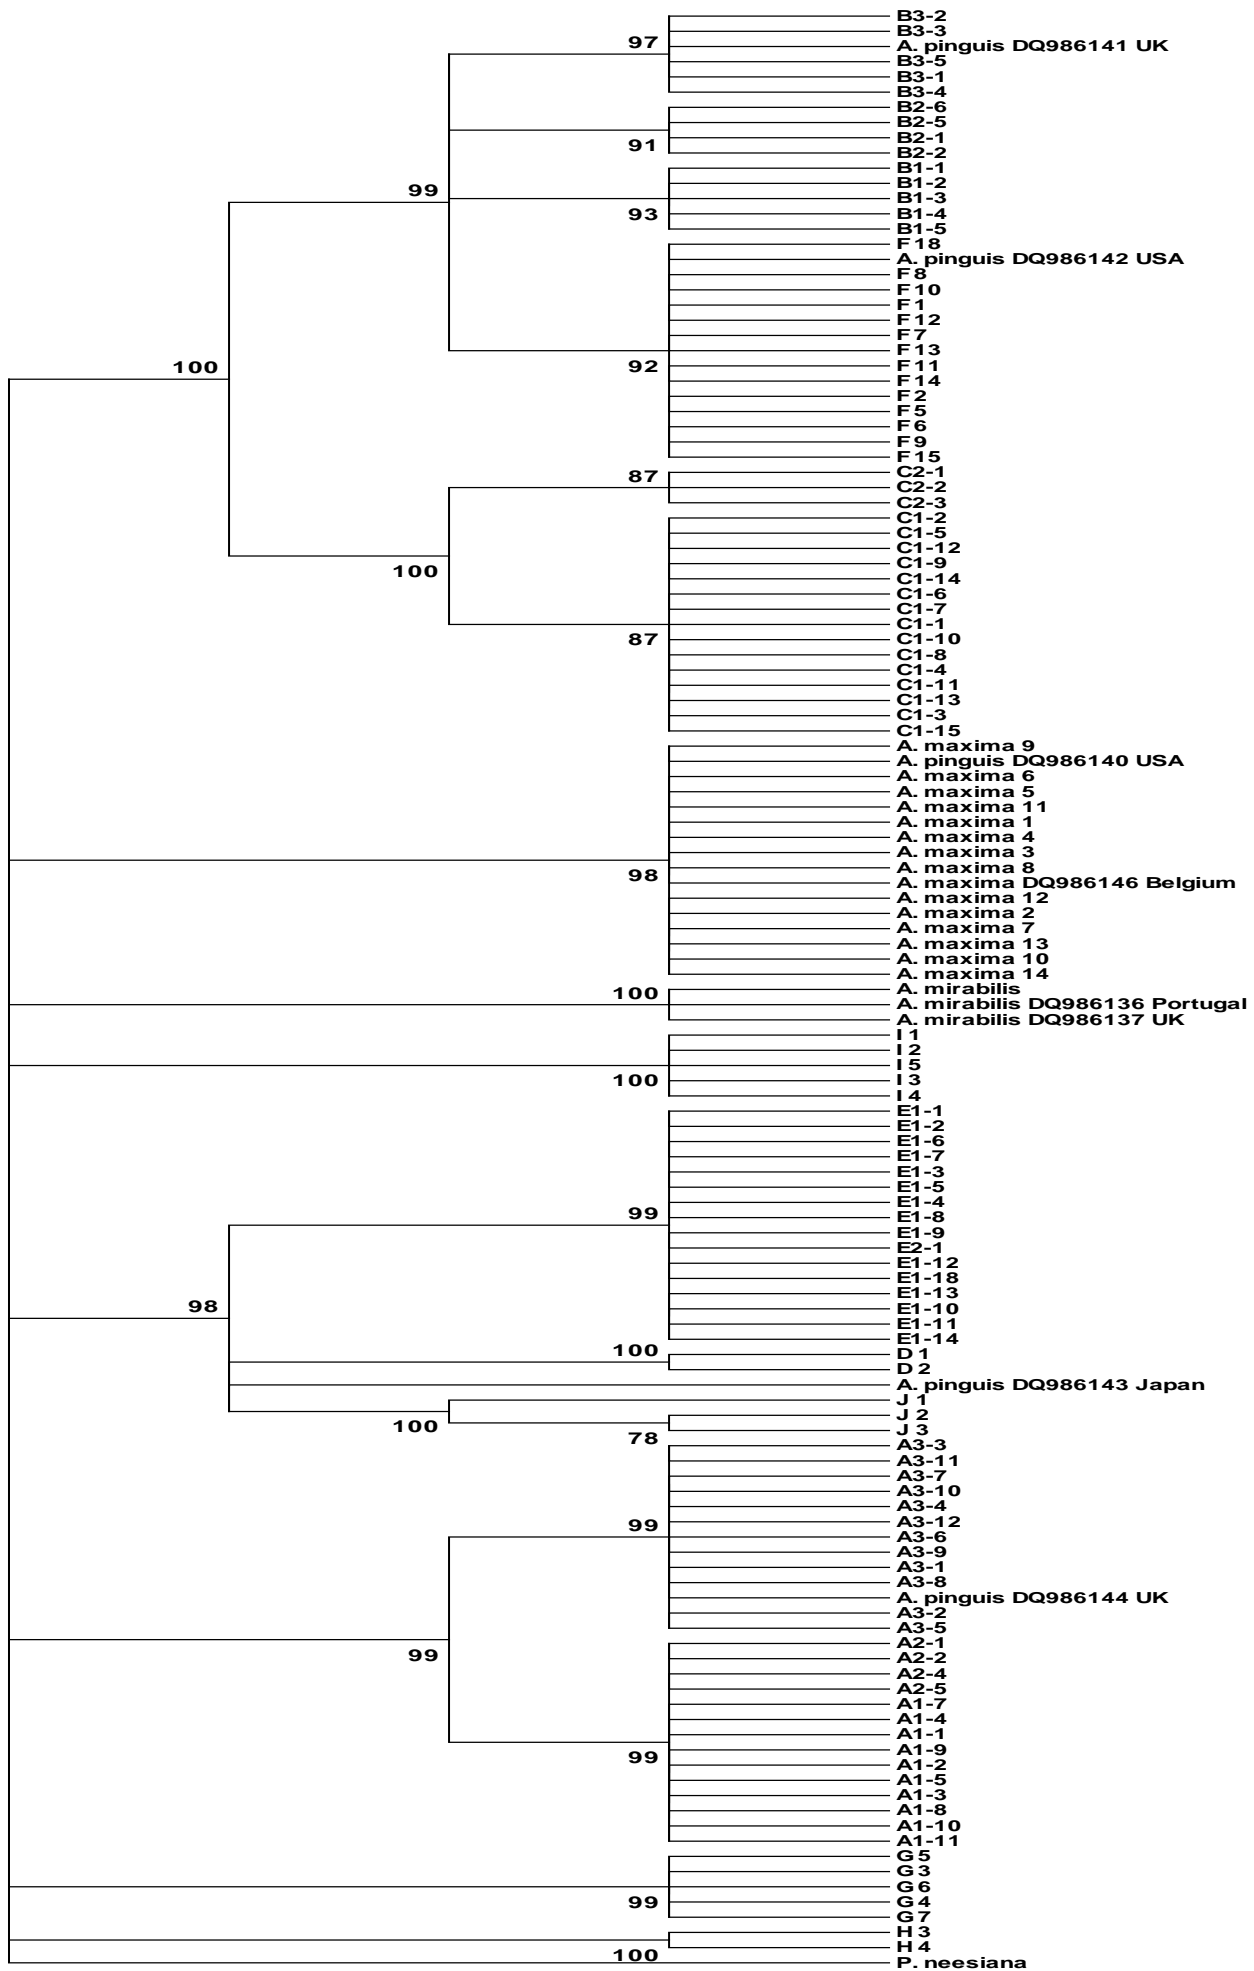

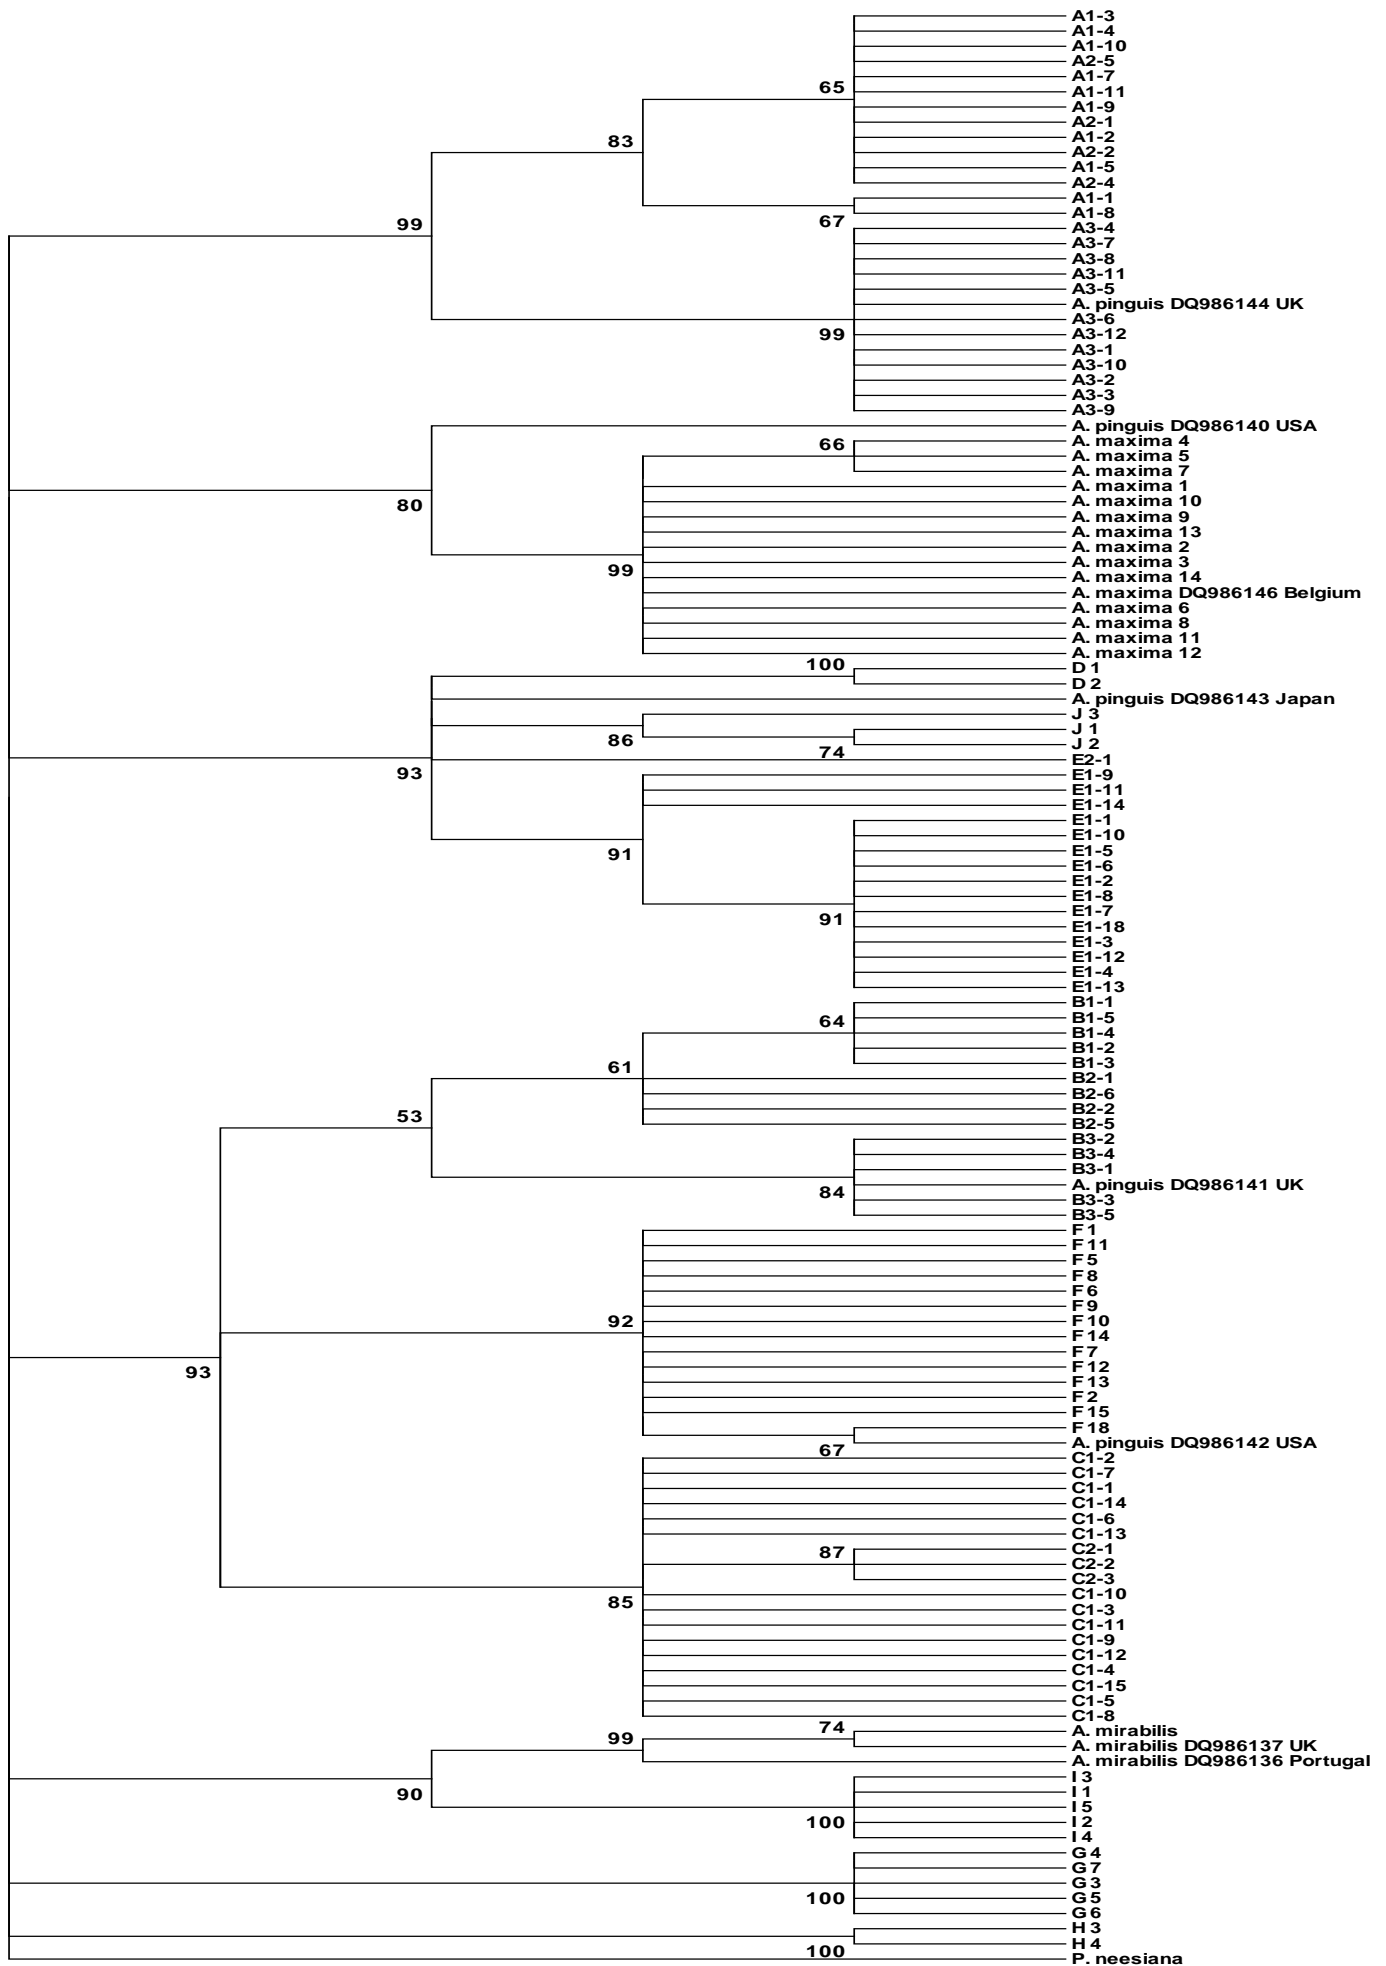

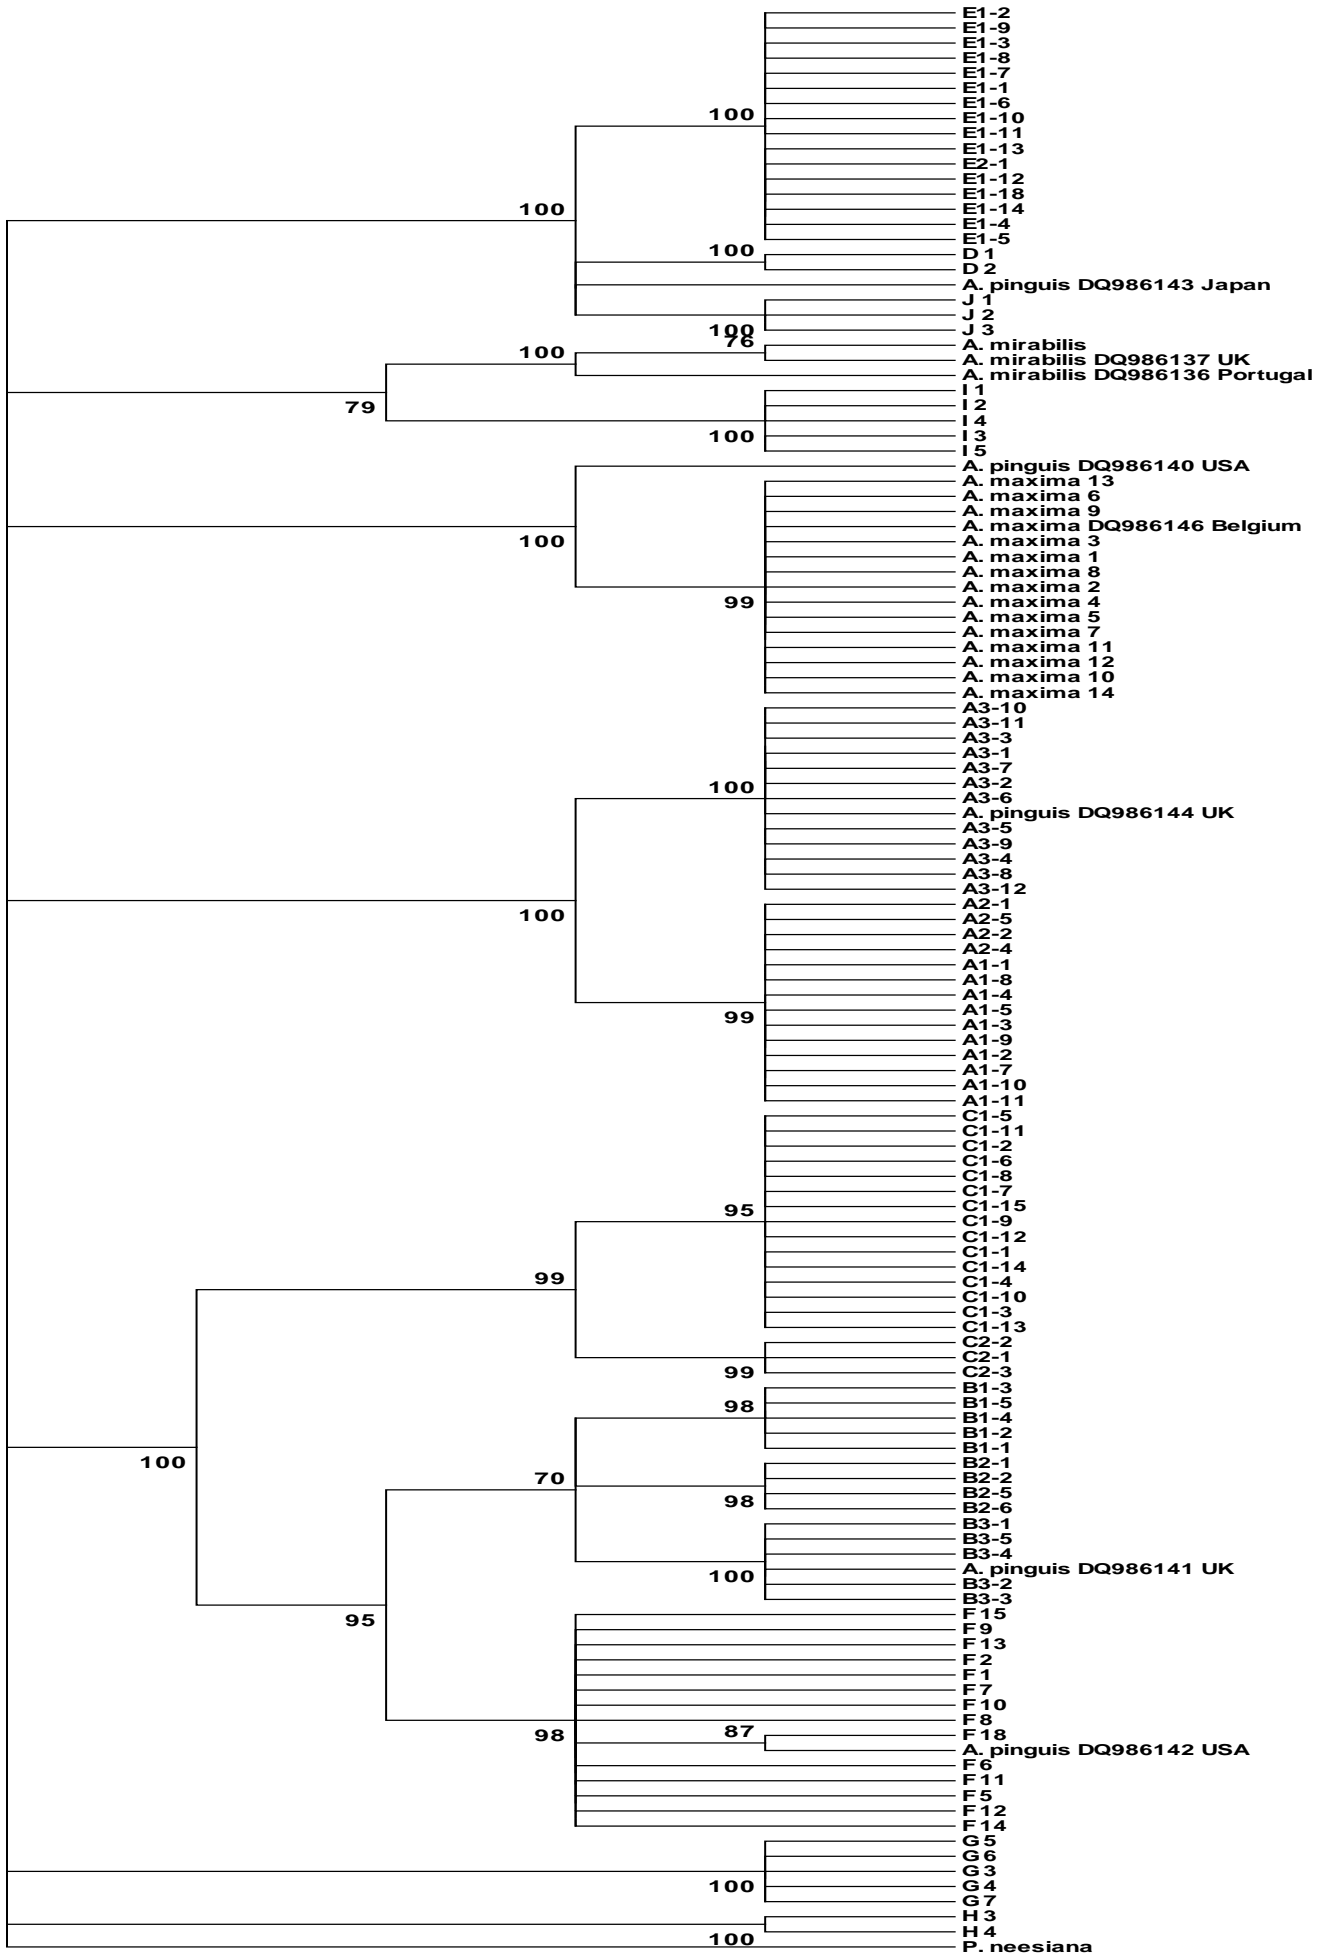

Supplement: pone.0188837.s006.pdf [file pone.0188837.s006.pdf]
